# Supplementary material for: Integrated asymmetric superwetting Janus membrane for the efficient separation of various surfactant-stabilized oil–water emulsions
Source: Royal Society of Chemistry journal article supplement (doi:10.1039/d1en00335f), 2021-01-01
Supplement: d1en00335f1.pdf [file d1en00335f1.pdf]

*Electronic Supplementary Information for:*

**Integrated asymmetric superwetting Janus membrane for the  
efficient separation of various surfactant-stabilized oil-water  
emulsions**

Xiuping Chen,<sup>a</sup> Yushuang Yang,<sup>a</sup> Yiming Li,<sup>a,\*</sup> Mutai Bao,<sup>a</sup> Dan Zhang,<sup>a</sup> Zhining  
Wang<sup>b,\*</sup>

<sup>a</sup>Key Laboratory of Marine Chemistry Theory and Technology, Ministry of  
Education, Ocean University of China, Qingdao 266100, P.R. China

<sup>b</sup> Shandong Key Laboratory of Water Pollution Control and Resource Reuse, School  
of Environmental Science and Engineering, Shandong University, Jinan 250100, P.R.  
China

---

\* Corresponding author.

E-mail address: [liyym@ouc.edu.cn](mailto:liyym@ouc.edu.cn) (Y. M. Li); [wangzhn@sdu.edu.cn](mailto:wangzhn@sdu.edu.cn) (Z.N. Wang).

### **Text S1 Effects of MHCH nanowires and SiO<sub>2</sub> microspheres concentration on the membrane separation performance**

The separation performance of hydrophobic MHCH&SiO<sub>2</sub> membrane for W/O emulsion was influenced by the amounts of MHCH and SiO<sub>2</sub>. All the hydrophobic MHCH&SiO<sub>2</sub> membrane is about 6 cm in diameter. As can be seen from **Fig. S5**, when the amount of MHCH nanowires is kept constant, separation flux gradually increases with the amount of SiO<sub>2</sub> microspheres. More SiO<sub>2</sub> microspheres increases the porosity of the membrane, thereby increasing membrane separation flux. However, the separation flux declines progressively with the amount of MHCH nanowires due to the formation of a much denser membrane. The decreased porosity reduces the membrane separation flux. **Fig. S6** shows that when  $m_{\text{MHCH}} < 0.08$  g and  $m_{\text{SiO}_2} < 0.27$  g, the resulting filtrates were relatively turbid. When  $0.12$  g  $< m_{\text{MHCH}} < 0.15$  g and  $0.13$  g  $< m_{\text{SiO}_2} < 1.00$  g, clear filtrates were obtained. So, taking into account the separation performance and synthesis cost, 0.12 g MHCH and 0.40 g SiO<sub>2</sub> were used to prepare hydrophobic MHCH&SiO<sub>2</sub> membrane in the following studies. Under this condition, the freestanding MHCH&SiO<sub>2</sub> membrane individually shows a high separation flux of about 2600 L m<sup>-2</sup> h<sup>-1</sup> for W-H emulsion and better emulsion separation performance (**Fig. S6 MS9**).

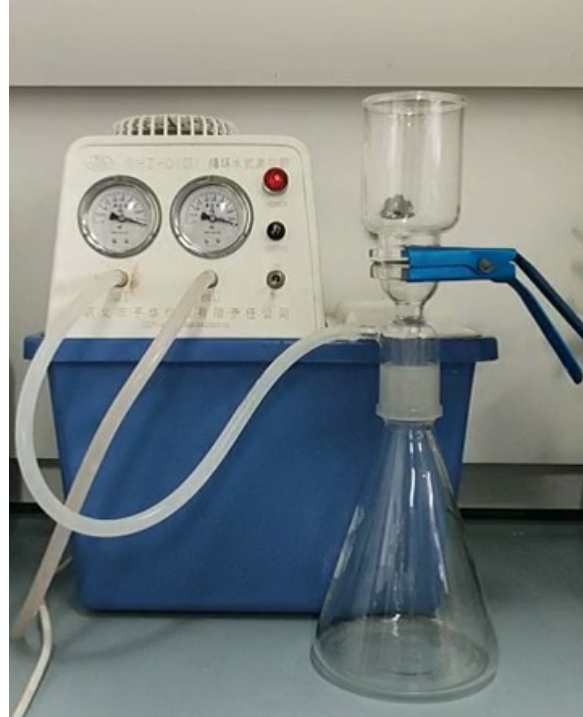

**Fig. S1** Digital photo of the filter facility and the vacuum pump.

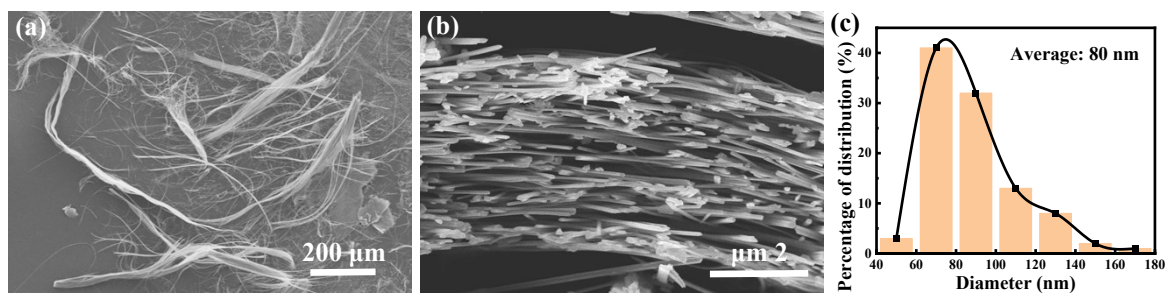

**Fig. S2** SEM images (a, b) and diameter distribution (c) of MHCH nanowires. The diameter distribution data is obtained by the Nano Measurer software statistical typical section SEM image (b).

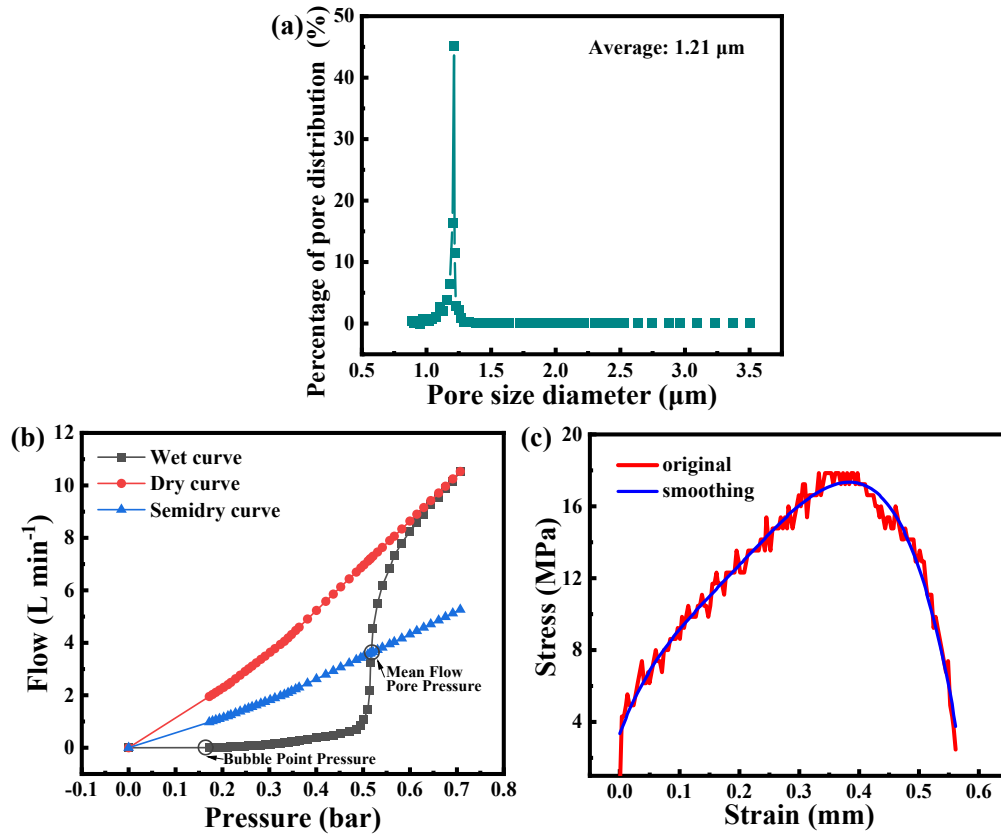

**Fig. S3** Pore diameter distributions of the hydrophobic (PDMS&TPE)@(MHCH&SiO<sub>2</sub>) membrane (a). The curve of the N<sub>2</sub> flow-pressure of the wet, dry and semidry hydrophobic (PDMS&TPE)@(MHCH&SiO<sub>2</sub>) membrane (b). The mechanical properties (c) of the hydrophobic (PDMS&TPE)@(MHCH&SiO<sub>2</sub>) membrane.

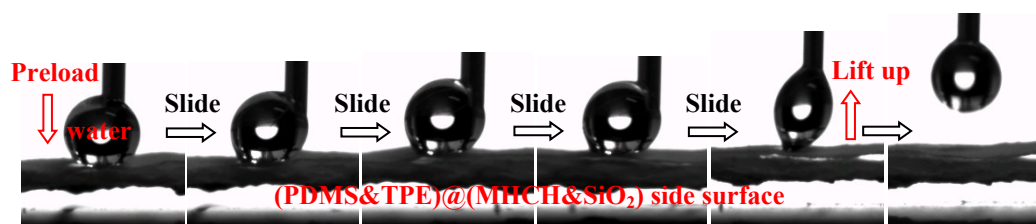

**Fig. S4** Photographs of the dynamic water repelling on the hydrophobic (PDMS&TPE)@(MHCH&SiO<sub>2</sub>) side in air.

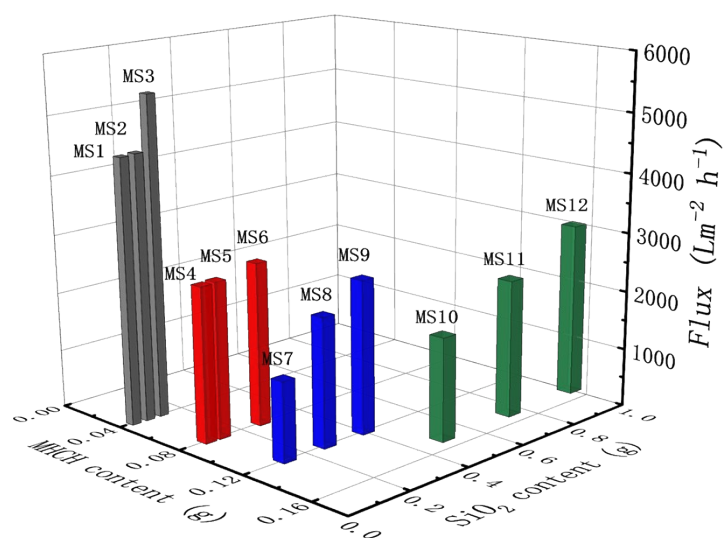

**Fig. S5** Summary of W-H emulsion separation flux by hydrophobic MHCH&SiO<sub>2</sub> membrane prepared from different amounts of MHCH nanowires and SiO<sub>2</sub> microspheres. All the hydrophobic MHCH&SiO<sub>2</sub> membrane is about 6 cm in diameter. ( $C_{\text{MHCH}} = 1.0 \text{ mg mL}^{-1}$ ).

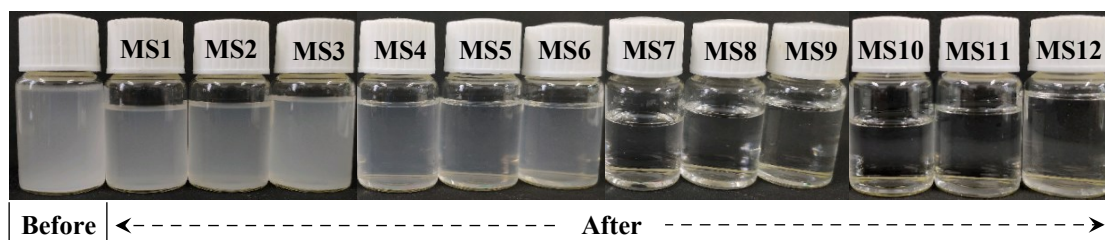

**Fig. S6** Digital photos of W-H emulsion before and after separation by hydrophobic MHCH&SiO<sub>2</sub> membrane prepared from different amounts of MHCH and SiO<sub>2</sub> (MS1-MS12). Original W-H emulsion ( $C_{\text{Span80}} = 1.5 \text{ mg mL}^{-1}$ ,  $V_{\text{n-hexane}}:V_{\text{water}} = 99:1$ ).



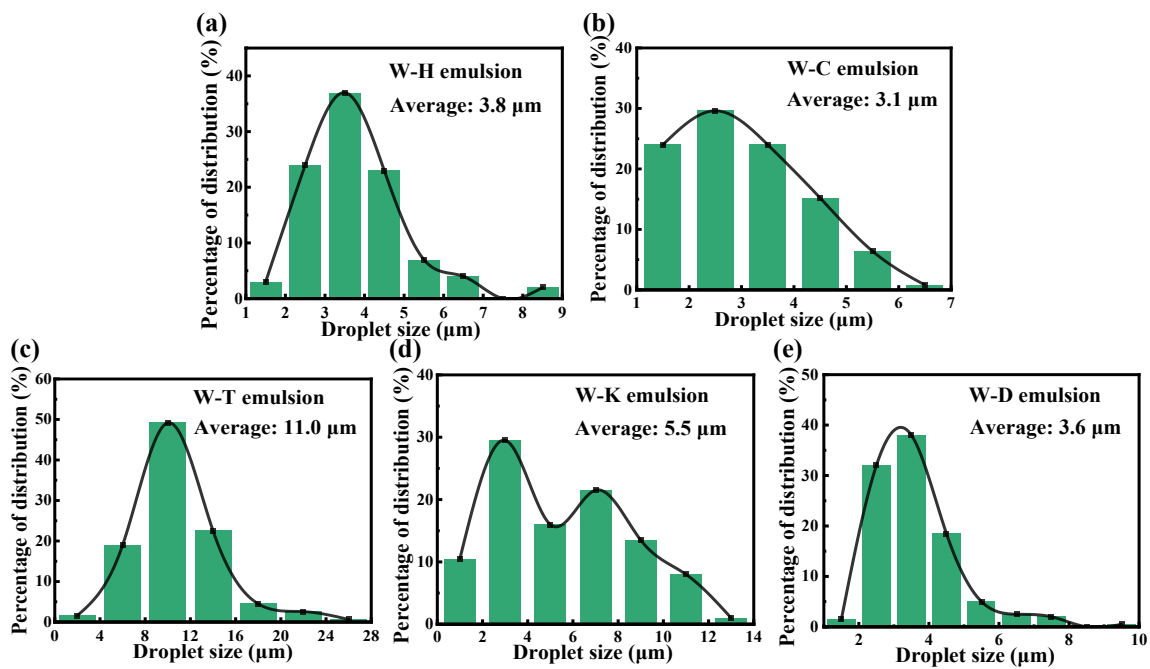

**Fig. S7** Corresponding water droplet size distribution of (a) W-H, (b) W-C, (c) W-T, (d) W-K, (e) W-D emulsions stabilized by Span 80 before separation.

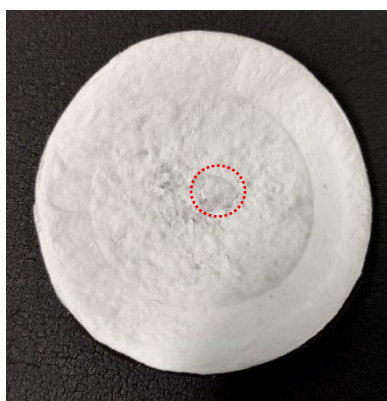

**Fig. S8** Digital photo of the large water droplets collected on the hydrophobic MHCH&SiO<sub>2</sub> side of Janus membrane.

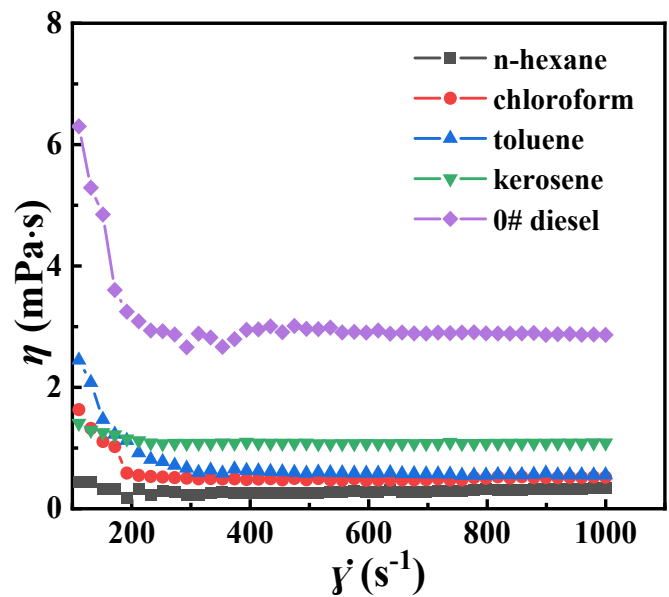

Fig. S9 Shear viscosity of five oils at different shear rates.

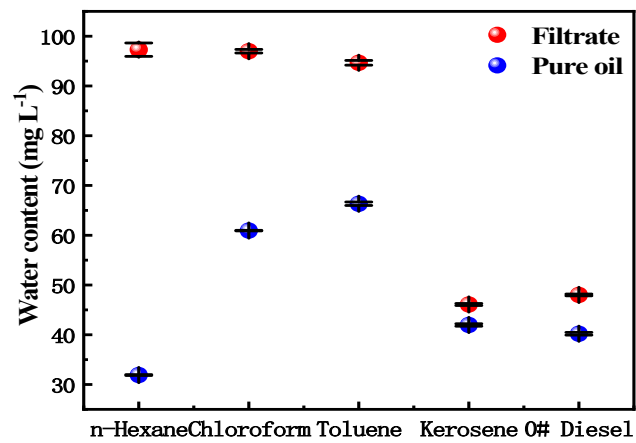

**Fig. S10** Water content of the water-in-oil emulsions filtrate and the corresponding pure oil.

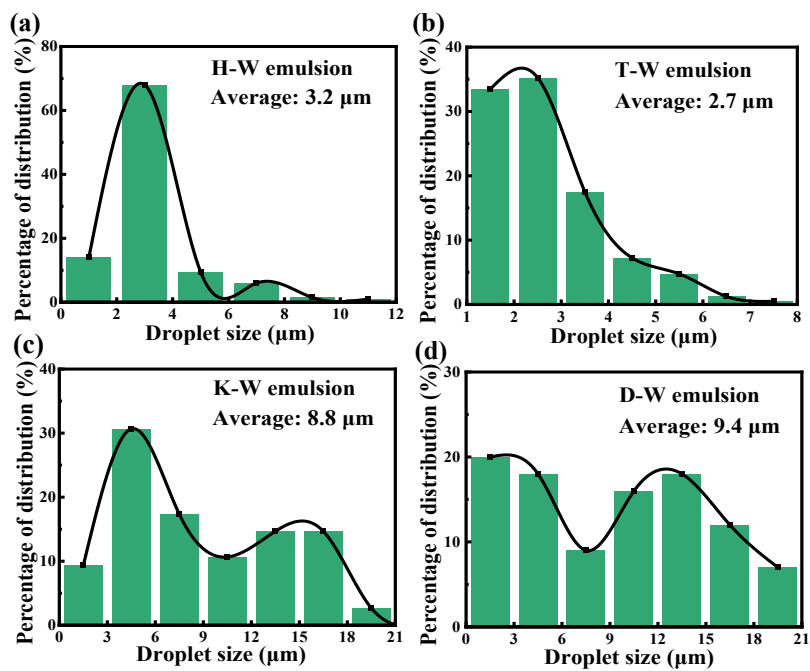

**Fig. S11** Corresponding water droplets distribution of the emulsifier SDS stabilized (a) H-W, (b) T-W, (c) K-W, (d) D-W emulsions before separation.

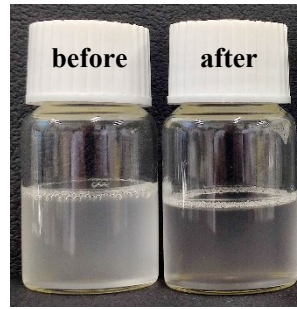

**Fig. S12** Digital photo of the H-W emulsions before and after separation by the individual  $\text{Co}_3\text{O}_4$  nanoneedles@SSM membrane.

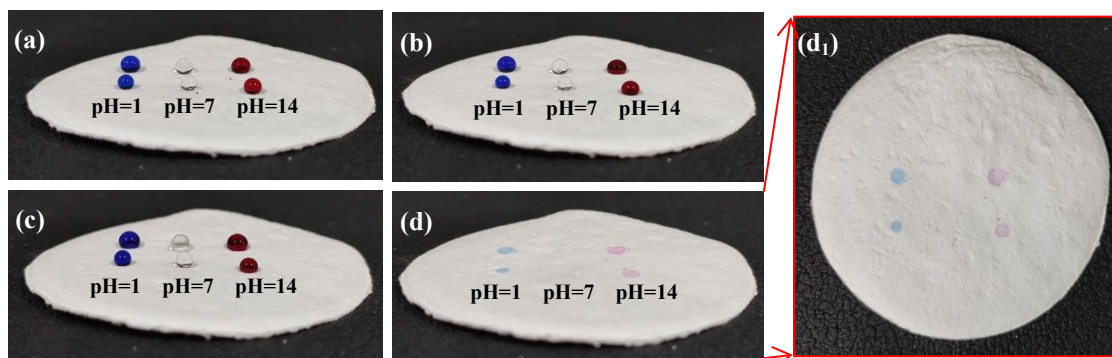

**Fig. S13** Digital photos of water droplets toward different pH values on the hydrophobic MHCH&SiO<sub>2</sub> membrane surface after a while (a) 1 h, (b) 3 h, (c) 6 h. Digital photos after the different pH water droplets were removed from the membrane surface after 6 h (d, d<sub>1</sub>). The color is used here for better recognition.

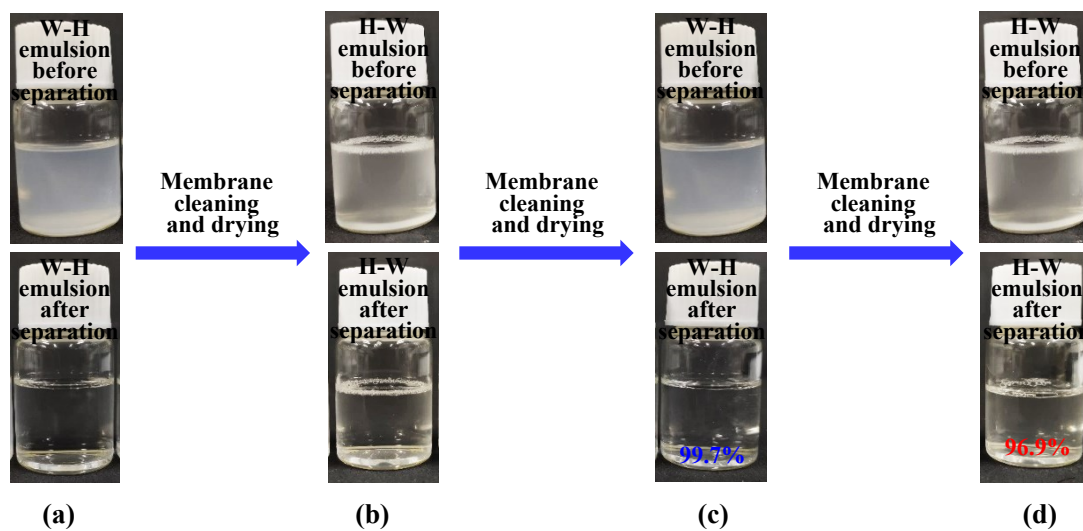

**Fig. S14** Alternately used performance of the integrated Janus membrane for W-H and H-W emulsion separation.



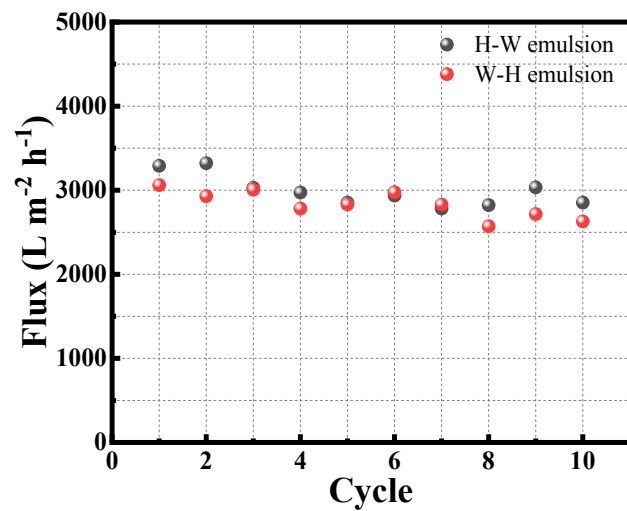

**Fig. S15** The recyclability of the integrated Janus membrane for Span 80 stabilized W-H (a) and SDS-stabilized H-W (b) emulsions separation.

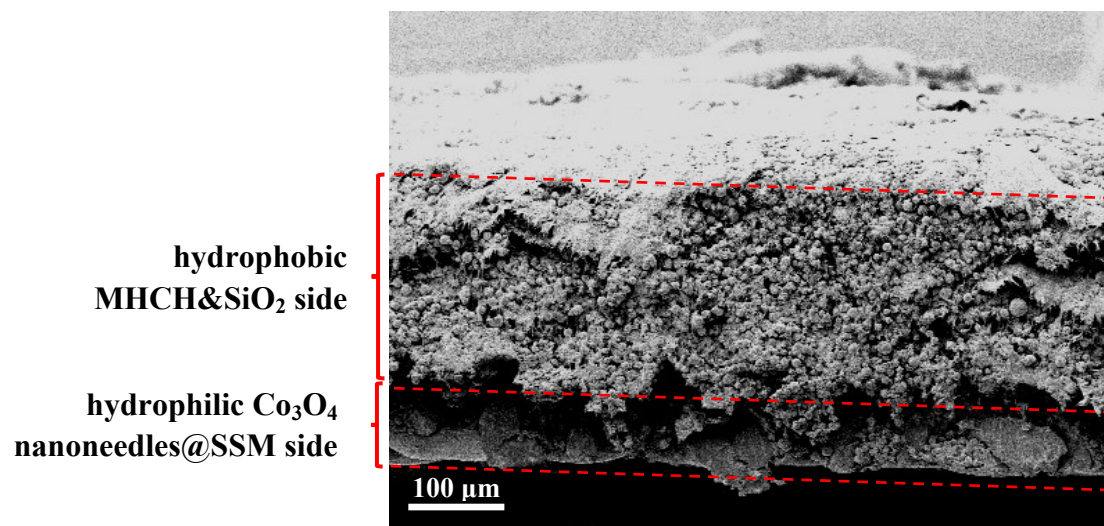

**Fig. S16** Cross-section view of the integrated Janus membrane.

**Table S1** Pore properties of the hydrophobic (PDMS&TPE)@(MHCH&SiO<sub>2</sub>) membrane.

| Pore characters                         | Value |
|-----------------------------------------|-------|
| Average Pore Diameter ( $\mu\text{m}$ ) | 1.21  |
| Bubble Point Diameter ( $\mu\text{m}$ ) | 3.64  |
| Minimum Diameter ( $\mu\text{m}$ )      | 0.89  |
| Mean Flow Pore Pressure (bar)           | 0.52  |
| Bubble Point Pressure (bar)             | 0.17  |

**Table S2.** Comparison of W/O emulsions separation performance with filtration materials reported recently.

| Filtration materials                                  | Oil        | $V_{oil}:V_{water}$ | Droplet size ( $\mu\text{m}$ ) | $C_{Span80}$ ( $\text{mg mL}^{-1}$ ) | Flux ( $\text{L m}^{-2} \text{h}^{-1}$ ) | TMP (bar) | Separation efficiency (%) | Ref       |
|-------------------------------------------------------|------------|---------------------|--------------------------------|--------------------------------------|------------------------------------------|-----------|---------------------------|-----------|
| PNIPAAm coated nylon membrane                         | n-hexane   | 100:1               | 6.59                           | 1.0                                  | ~1300                                    | 1.0       | >97.8                     | 41        |
|                                                       | toluene    |                     | 3.99                           |                                      | ~1050                                    |           | >97.8                     |           |
| PANI-SiNPs Janus membrane                             | n-hexane   | 100:1               | 6.84                           | 1.5                                  | ~1400                                    | <1.0      | >99.0                     | 21        |
|                                                       | toluene    |                     | 9.01                           |                                      | ~1500                                    |           | >99.0                     |           |
| Janus F-TiO <sub>2</sub> @PPS Porous Membrane         | n-hexane   | 99:1                | ~2                             | 0.5                                  | 3500                                     | 0.9       | 98.2                      | 47        |
|                                                       | chloroform |                     | ~2                             |                                      | 2400                                     |           | 98.1                      |           |
|                                                       | toluene    |                     | ~2                             |                                      | 2900                                     |           | 98.4                      |           |
| Janus CNTs@PAN <sub>EN</sub> membrane                 | chloroform | 9:1                 | ~1                             | 0.5                                  | ~8400                                    | 0.7       | ~99.2                     | 36        |
| Coprinus comatus-coated PVDF membrane                 | n-hexane   | 50:1                | 0.050-1                        | 0.4                                  | 78-112                                   | 0.85      | ~99.0                     | 42        |
|                                                       | kerosene   |                     | 0.050-1                        |                                      |                                          |           | ~99.4                     |           |
|                                                       | diesel     |                     | 0.050-1                        |                                      |                                          |           | ~98.85                    |           |
| Egg shells powders coated PVDF membrane               | kerosene   | 50:1                | 0.1-0.5                        | 2.0                                  | ~200                                     | 0.5       | ~99.7                     | 45        |
| Candle soot coated PVDF membrane                      | kerosene   | 50:1                | 0.1-0.9                        | 0.1-0.2wt%                           | ~75                                      | 0.85      | >99.99                    | 43        |
| PDVB Modified PVDF Membrane                           | diesel     | 100:1               | 0.06-0.09                      | 2.5                                  | ~60                                      | 0.8       | ~99.98                    | 44        |
| Janus ZnO-cellulose/MnO <sub>2</sub> hybrid membranes | n-hexane   | 96:4                | -                              | 3.0                                  | ~1035                                    | 0.3       | >99.4                     | 23        |
|                                                       | toluene    |                     | 0.5-3.5                        |                                      | ~2589                                    |           | >99.4                     |           |
|                                                       | chloroform |                     | -                              |                                      | ~2652                                    |           | >99.4                     |           |
|                                                       | diesel     |                     | -                              |                                      | ~477                                     |           | >99.4                     |           |
| Integrated Janus membrane                             | n-hexane   | 99:1                | 3.8                            | 1.5                                  | 3349                                     | 0.6       | 99.03                     | This work |
|                                                       | chloroform |                     | 3.1                            |                                      | 2321                                     |           | 99.03                     |           |
|                                                       | toluene    |                     | 11.0                           |                                      | 1757                                     |           | 99.06                     |           |
|                                                       | kerosene   |                     | 5.5                            |                                      | 1817                                     |           | 99.54                     |           |
|                                                       | 0# diesel  |                     | 3.6                            |                                      | 1132                                     |           | 99.52                     |           |

**Table S3.** Comparison of O/W emulsions separation performance with some related S20

filtration materials reported previously.

| Filtration materials                                                      | Oil       | $V_{\text{water}}:V_{\text{oil}}$ | Droplet size<br>( $\mu\text{m}$ ) | $C_{\text{Surfactant}}$<br>( $\text{mg mL}^{-1}$ ) | Flux<br>( $\text{L m}^{-2} \text{h}^{-1}$ ) | TMP<br>(bar) | separation<br>efficiency (%) | Ref       |
|---------------------------------------------------------------------------|-----------|-----------------------------------|-----------------------------------|----------------------------------------------------|---------------------------------------------|--------------|------------------------------|-----------|
| PNIPAAm coated nylon membrane                                             | n-hexane  | 100:1                             | 11.34                             | $C_{\text{SDS}}=1.0$                               | ~2500                                       | gravity      | >99                          | 41        |
|                                                                           | toluene   |                                   | 8.71                              |                                                    | ~2000                                       |              | >99                          |           |
| PANI-SiNPs Janus membrane                                                 | n-hexane  | 100:1                             | 7.98                              | $C_{\text{SDS}}=1.5$                               | ~1900                                       | <0.3         | >99.7                        | 21        |
|                                                                           | toluene   |                                   | 9.39                              |                                                    | ~1600                                       |              | >99.7                        |           |
| Janus F-TiO <sub>2</sub> @PPS Porous Membrane                             | n-hexane  | 99:1                              | 0-8                               | $C_{\text{SDS}}=0.5$                               | 4400                                        | 0.9          | 98.4                         | 47        |
|                                                                           | toluene   |                                   | 0-8                               |                                                    | 4700                                        |              | 98.5                         |           |
| Silica-decorated polypropylene membranes                                  | diesel    | 99:1                              | 0.1-7                             | $C_{\text{SDS}}=0.2$                               | ~1300                                       | 0.4          | >99                          | 48        |
| TiO <sub>2</sub> decorated Superhydrophilic PVDF membranes                | diesel    | 100:1                             | 1-20                              | $C_{\text{SDS}}=0.2$                               | 382                                         | 0.9          | ~99.52                       | 49        |
| Coprinus comatus-coated PVDF membrane                                     | n-hexane  | 50:1                              | 0.050-1                           | $C_{\text{Span80}}=0.4$                            | 70-80                                       | 0.85         | ~98.8                        | 42        |
|                                                                           | kerosene  |                                   | 0.050-1                           |                                                    |                                             |              | ~99.2                        |           |
|                                                                           | diesel    |                                   | 0.050-1                           |                                                    |                                             |              | ~99.15                       |           |
| PVDF/PDA/PMEN membrane                                                    | kerosene  | 99:1                              | 0.12                              | $C_{\text{Span80}}=2.5$                            | ~1600                                       | 1.0          | >99.9                        | 46        |
|                                                                           | n-hexane  |                                   | 0.43                              |                                                    | ~1700                                       |              | >99.9                        |           |
|                                                                           | toluene   |                                   | 0.31                              |                                                    | ~1550                                       |              | >99.9                        |           |
| Loess-coated PVDF membranes                                               | diesel    | 50:1                              | 0.1-1                             | $C_{\text{Tween80}}=2.0$                           | ~510                                        | 0.85         | >99.2                        | 50        |
| Candle soot coated PVDF membrane                                          | kerosene  | 50:1                              | 0.10-0.50                         | $C_{\text{Tween80}}=0.1-0.2 \text{ wt}\%$          | ~75                                         | 0.85         | ~99.3                        | 43        |
| Ultrathin 2D Ti <sub>3</sub> C <sub>2</sub> T <sub>x</sub> MXene membrane | kerosene  | 100:2                             | 0.10-0.50                         | $C_{\text{Tween80}}=2.0$                           | ~425                                        | 0.85         | >99.4                        | 51        |
| Janus ZnO-cellulose/MnO <sub>2</sub> hybrid membranes                     | n-hexane  | 96:4                              | -                                 | $C_{\text{Tween80}}=3.0$                           | ~4122                                       | 0.3          | >99.6                        | 23        |
|                                                                           | toluene   |                                   | 0.5-2.5                           |                                                    | ~3465                                       |              | >99.6                        |           |
|                                                                           | diesel    |                                   | -                                 |                                                    | ~2514                                       |              | >99.6                        |           |
| Integrated Janus Membrane                                                 | n-hexane  | 99:1                              | 3.2                               | $C_{\text{SDS}}=1.5$                               | 3121                                        | 0.8          | 99.6                         | This work |
|                                                                           | toluene   |                                   | 2.7                               |                                                    | 2863                                        |              | 99.9                         |           |
|                                                                           | kerosene  |                                   | 8.8                               |                                                    | 1975                                        |              | 99.6                         |           |
|                                                                           | 0# diesel |                                   | 9.4                               |                                                    | 2324                                        |              | 99.8                         |           |

**Table S4** Theoretical calculation of the pressure-related value of the liquid.

| Pressure | W/O emulsion separation | O/W emulsion separation |
|----------|-------------------------|-------------------------|
|----------|-------------------------|-------------------------|

|                        | (MPa)       | (MPa)       |
|------------------------|-------------|-------------|
| $P_L$ (n-hexane)       | 0.305       | -0.269      |
| $P_L$ (water)          | -1.041      | 1.190       |
| $P_H$ (n-hexane)       | 0-0.067     | –           |
| $P_H$ (water)          | –           | 0.101       |
| $P_P$                  | 0.060       | 0.08        |
| $P_{Total}$ (n-hexane) | 0.365-0.432 | -0.189      |
| $P_{Total}$ (water)    | -0.981      | 1.270-1.371 |
